# Supplementary material for: Controlled bulk polymerization of l-lactide and lactones by dual activation with organo-catalytic systems
Source: Royal Society of Chemistry journal article supplement (doi:10.1039/c4ra01239a), 2014-01-01
Supplement: c4ra01239a1.pdf [file c4ra01239a1.pdf]

*Electronic Supplementary Information*

**Controlled bulk polymerization of L-Lactide and lactones by dual activation with  
Organo-Catalytic Systems**

*Joji Kadota<sup>a,b,c</sup>, Drazen Pavlovic<sup>a,b</sup>, Hiroshi Hirano<sup>c</sup>, Akinori Okada<sup>c</sup>, Yasuyuki Agari<sup>c</sup>,  
Brigitte Bibal<sup>d</sup>, Alain Deffieux<sup>a,b</sup>, Frédéric Peruch<sup>a,b</sup>*

<sup>a</sup> Univ. Bordeaux, LCPO, UMR 5629, F-33600 Pessac, France.

<sup>b</sup> CNRS, LCPO, UMR 5629, F-33600 Pessac, France.

<sup>c</sup> Environmental Technology Research Division, Osaka Municipal Technical Research  
Institute, 1-6-50 Morinomiya, Joto-ku, Osaka 536-8553, Japan

<sup>d</sup> Université de Bordeaux, UMR CNRS 5255, 351 cours de la Libération, 33405 Talence  
Cedex, France

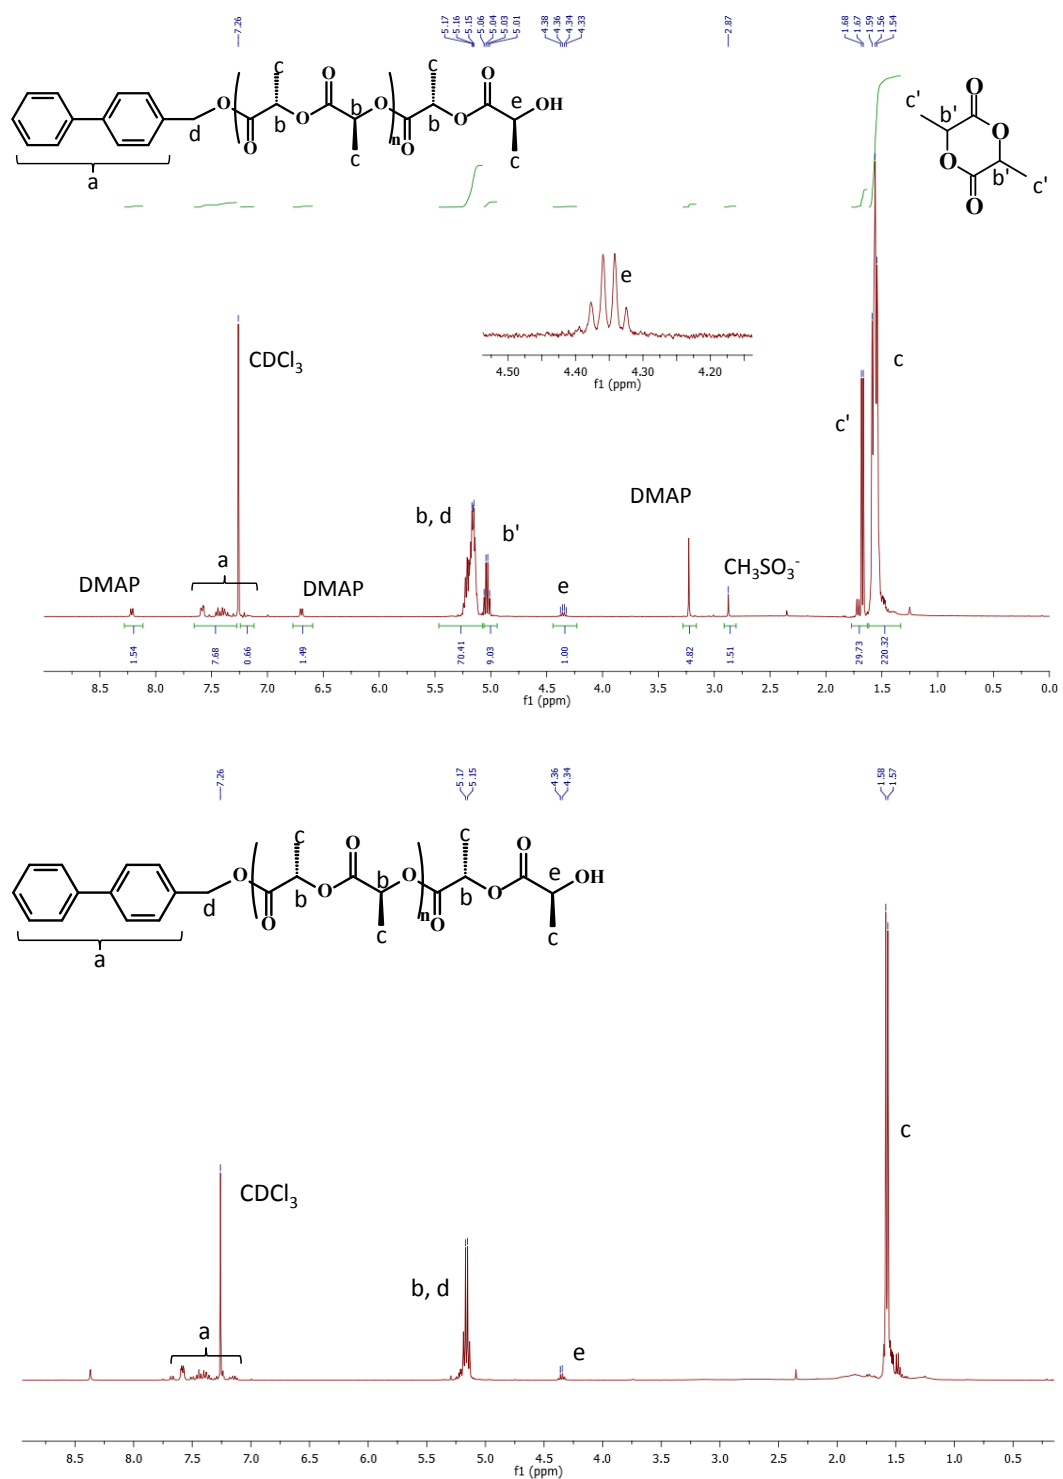

Figure S1. <sup>1</sup>H NMR spectrum of raw sample (top) and precipitated sample (bottom) of run 10 (Table 1)

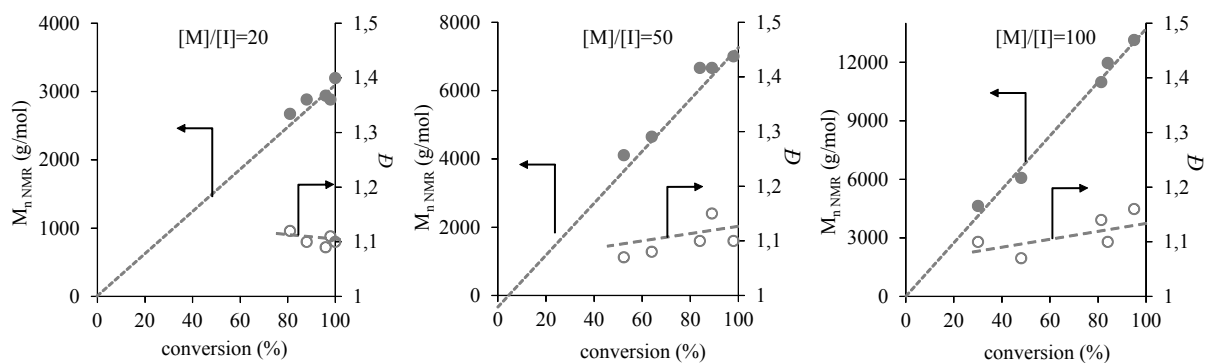

Figure S2.  $M_{n,SEC}$  versus L-LA conversion for experiments presented in Table 1

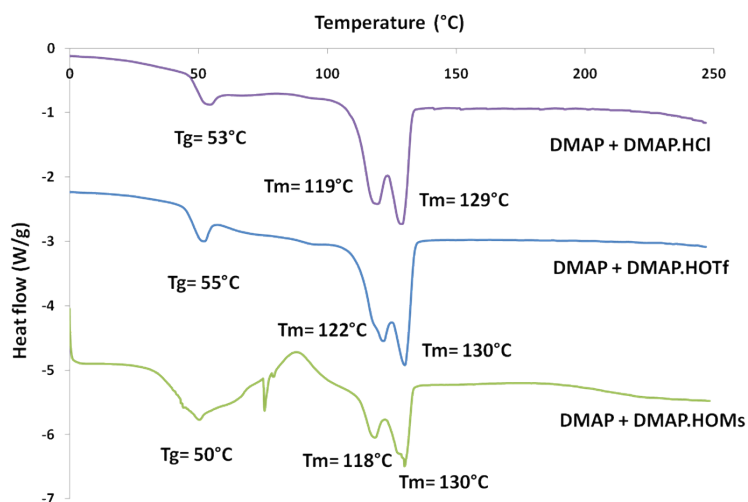

Figure S3. DSC thermograms of PLLA synthesized in bulk at 100°C (runs 14, 15 and 16 from Table 1)

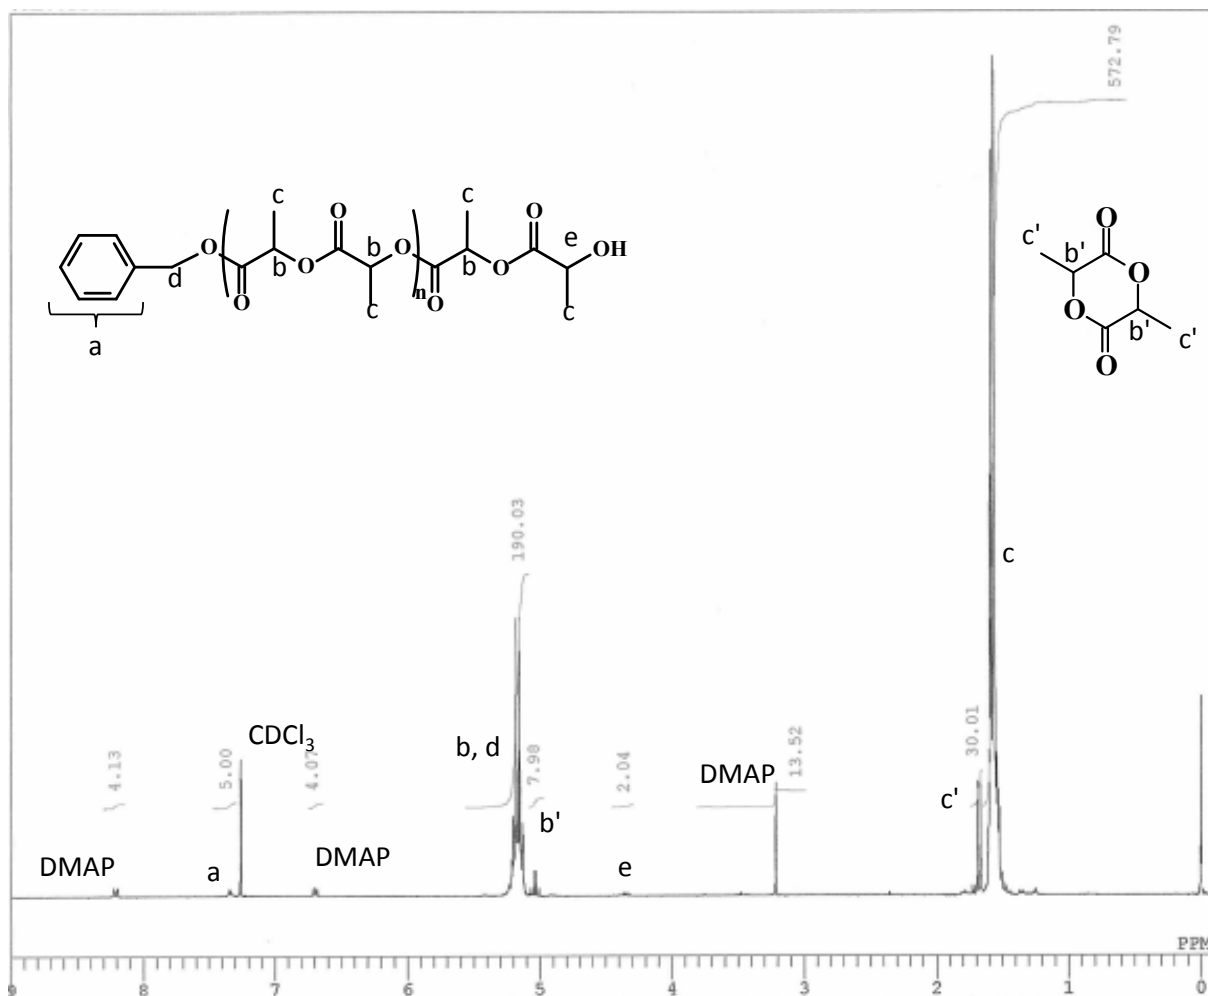

Figure S4. <sup>1</sup>H NMR spectrum of raw sample of run 21 (Table 2)

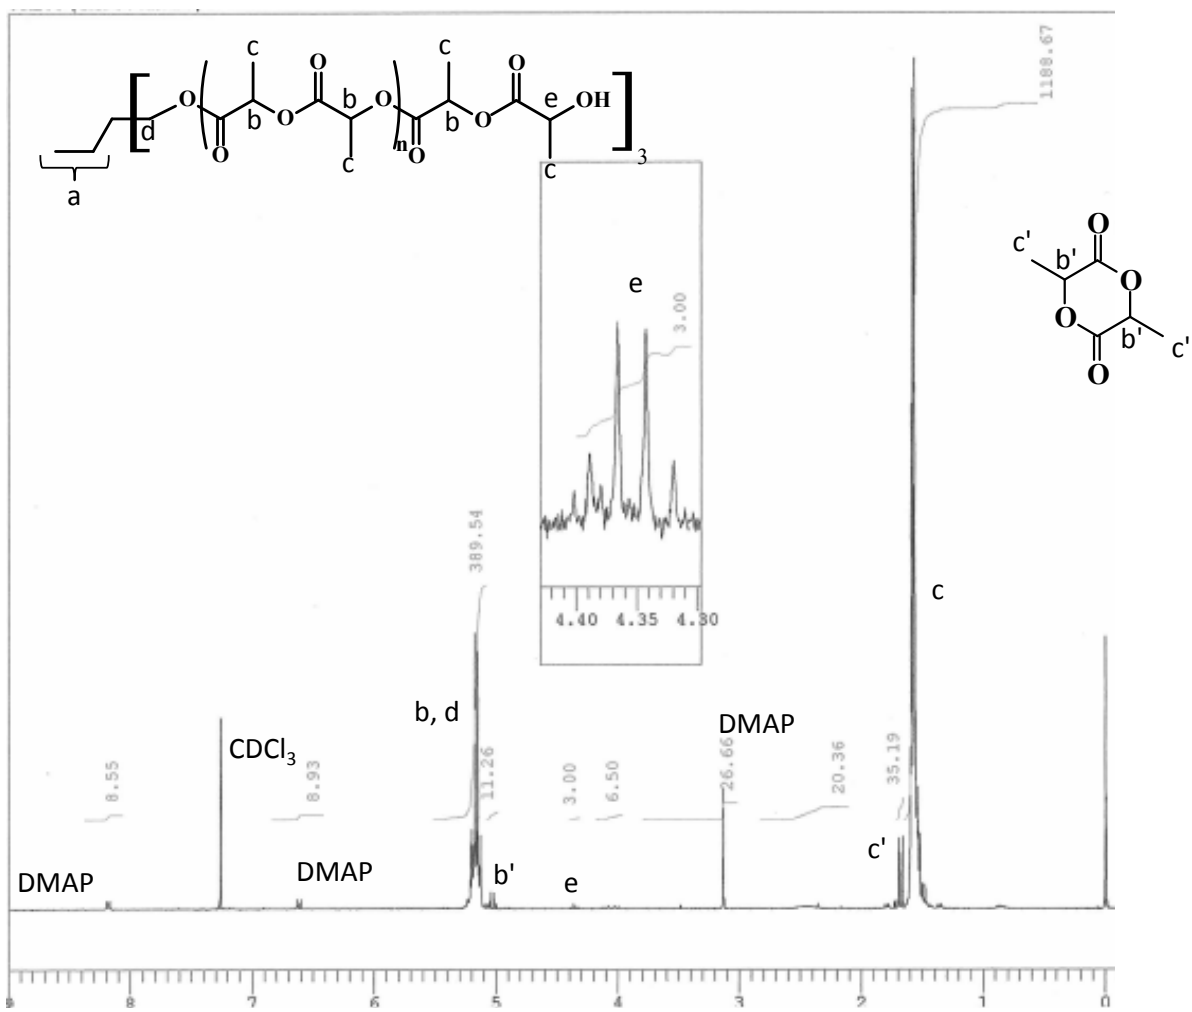

Figure S5.  $^1\text{H}$  NMR spectrum of raw sample of run 26 (Table 2)

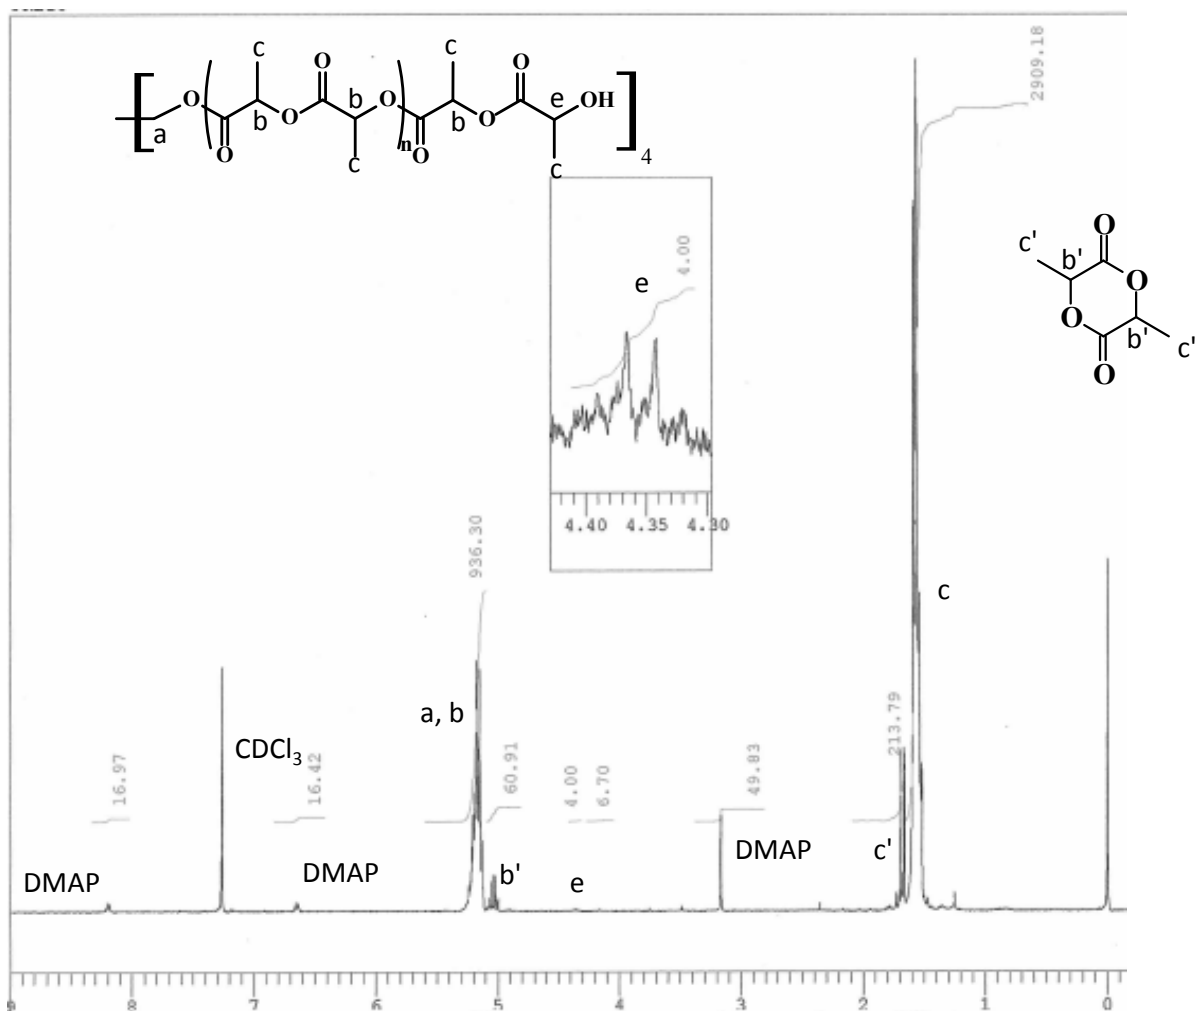

Figure S6. <sup>1</sup>H NMR spectrum of raw sample of run 27 (Table 2)

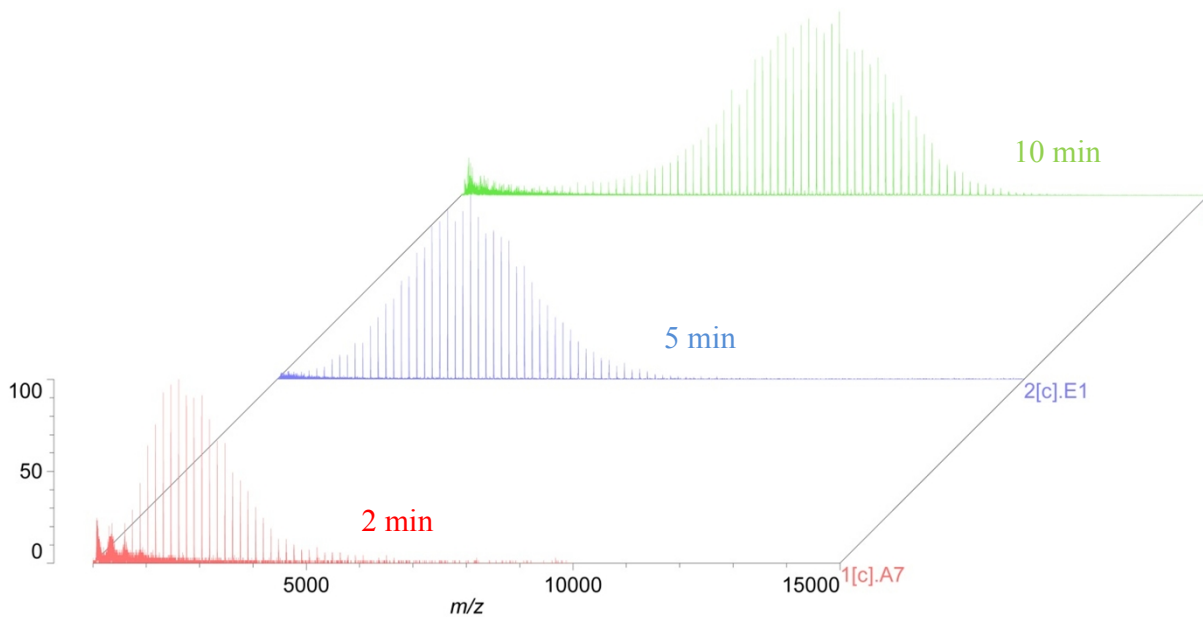

Figure S7. MALDI-TOF mass spectra of polylactides initiated with PeOH after 2, 5 and 10 min of reaction (DMAP/DMAP.HOTf, bulk, 100 °C)

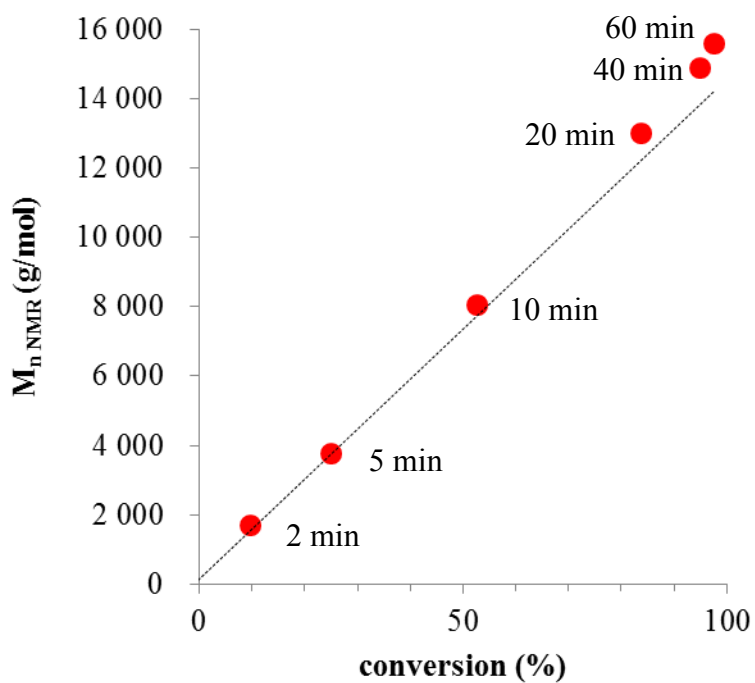

Figure S8. Evolution of molar masses of polylactides initiated with PeOH with conversion (DMAP/DMAP.HOTf, bulk, 100 °C), dashed line is the theoretical molar mass.

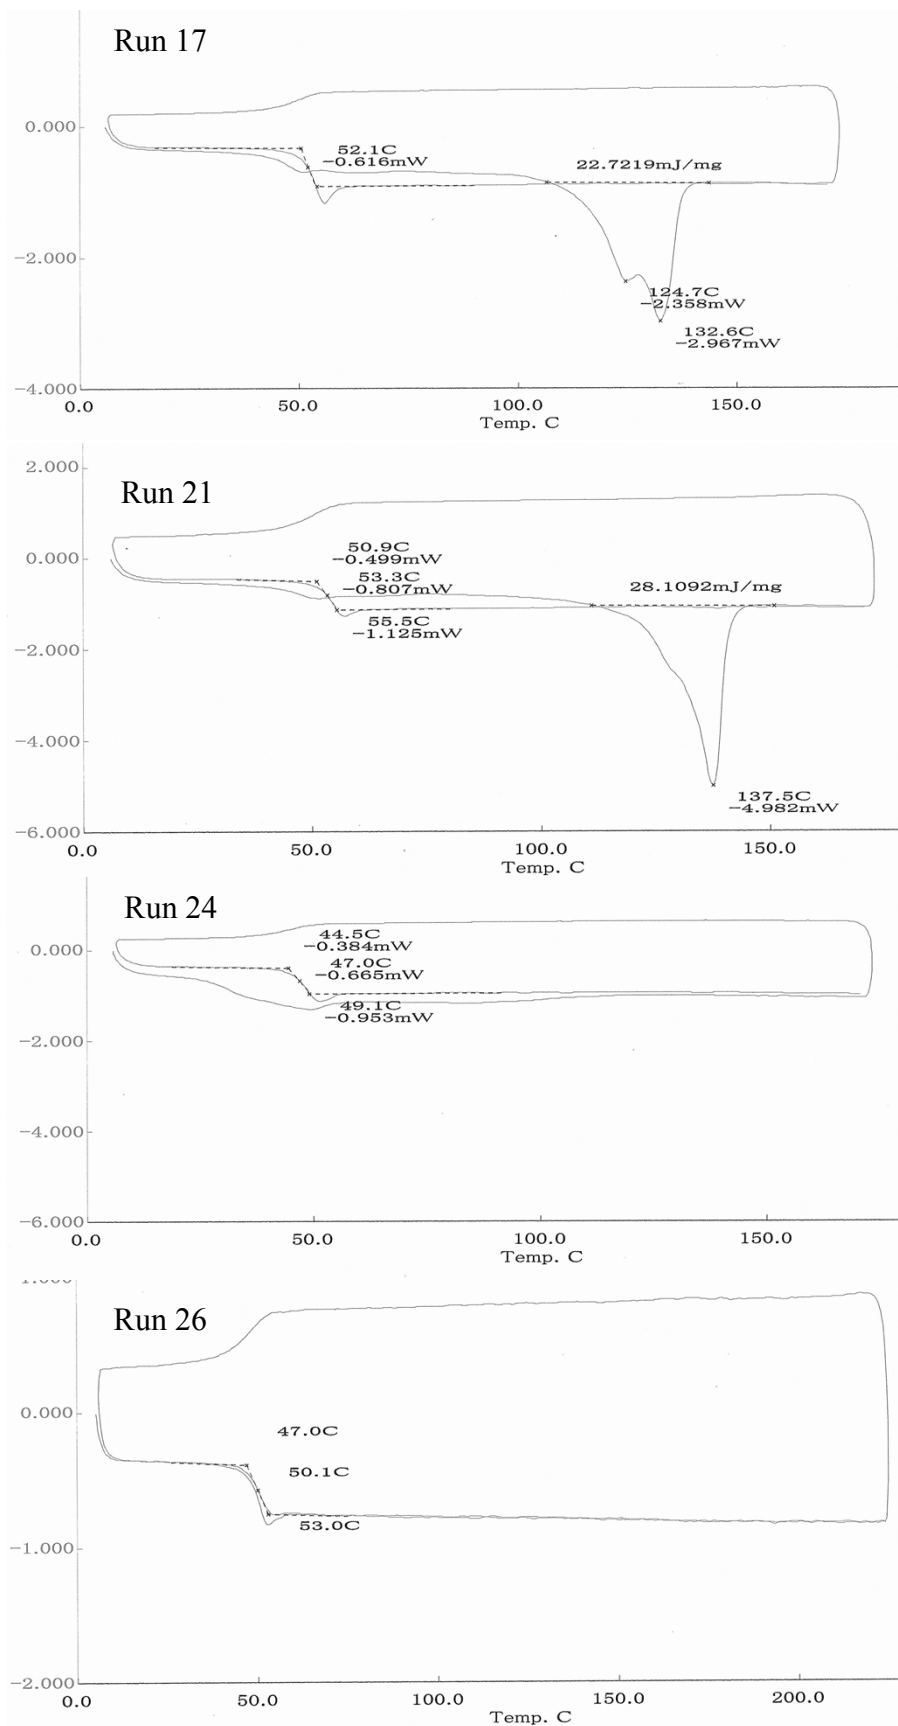

Figure S9. DSC thermograms of PLLA synthesized in bulk at 100°C (runs 17, 21, 24 and 26 from Table 2)



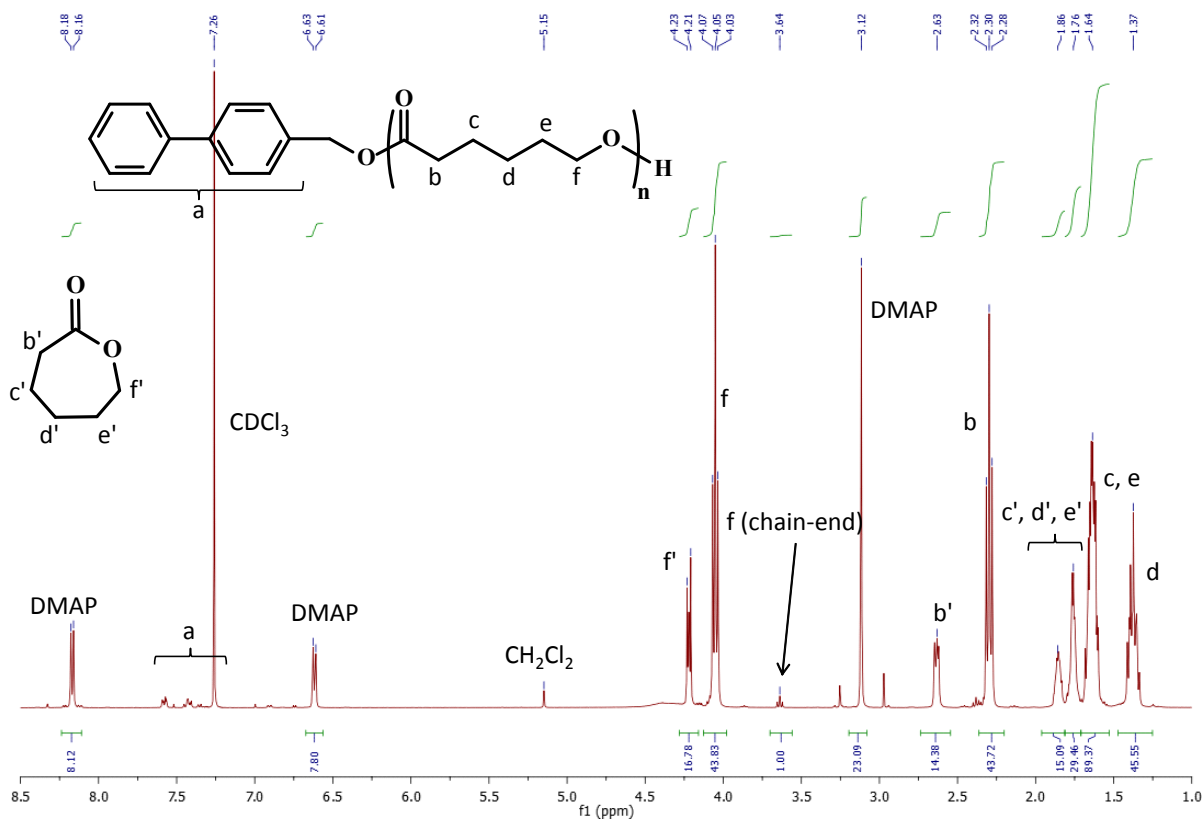

Figure S10. <sup>1</sup>H NMR spectrum of raw sample of run 34 (Table 3)

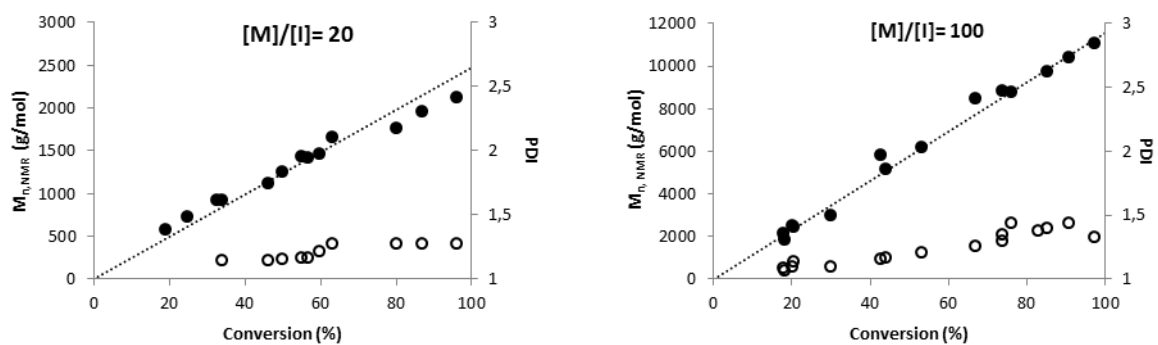

Figure S11. ROP of caprolactone ([M]/[I]=20 and [M]/[I]=100) catalyzed with DMAP/DMAP.HOTf catalytic system

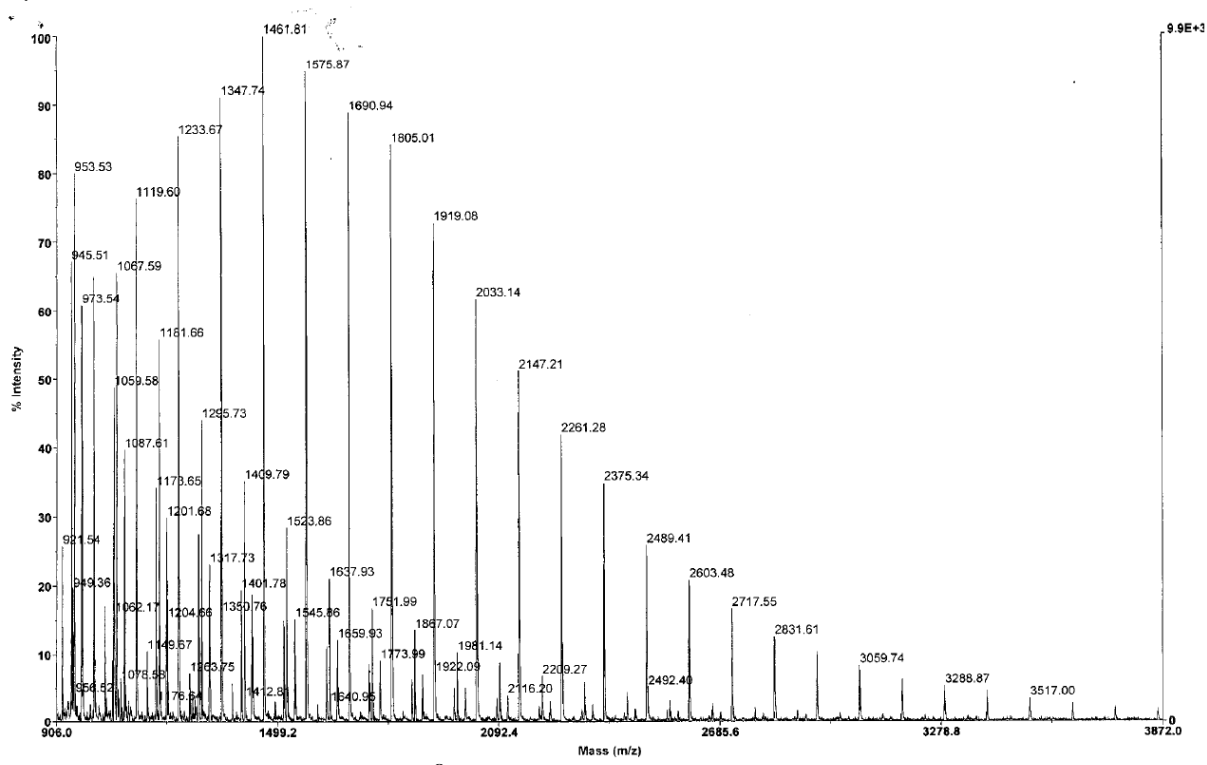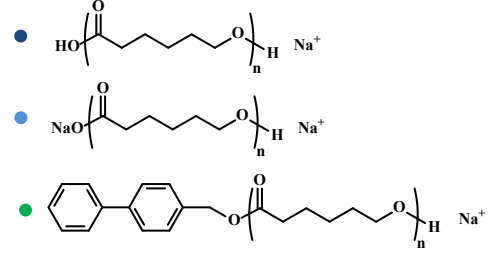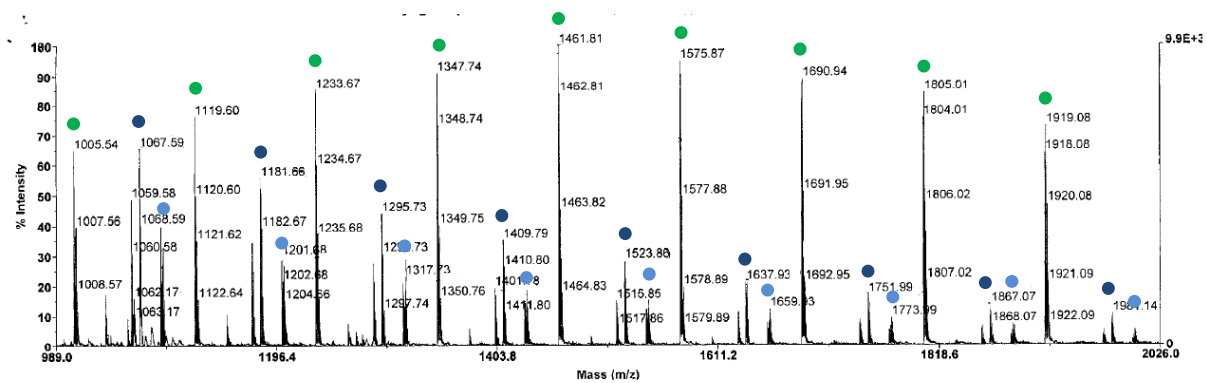

Figure S12. MALDI-TOF mass spectra of run 29 in Table 3 (top: full spectrum; bottom: zoom)

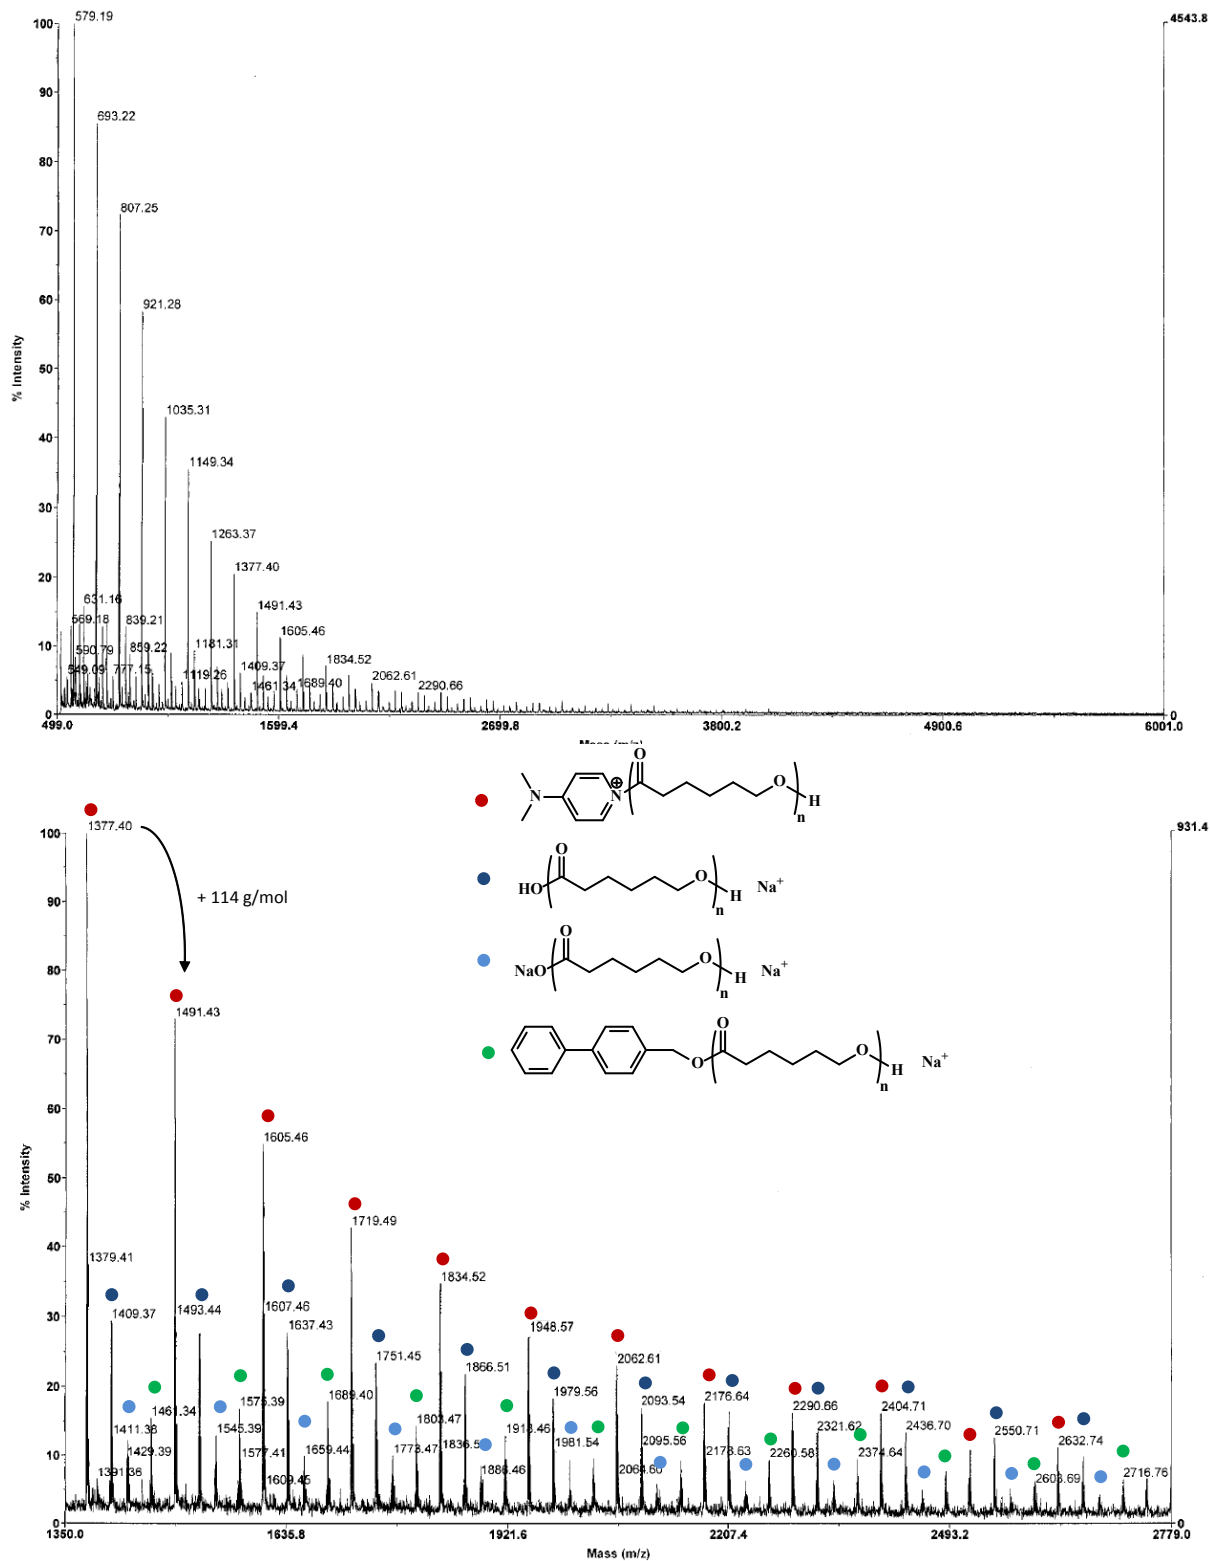

Figure S13. MALDI-TOF mass spectra of run 37 in Table 3 (top: full spectrum; bottom: zoom)

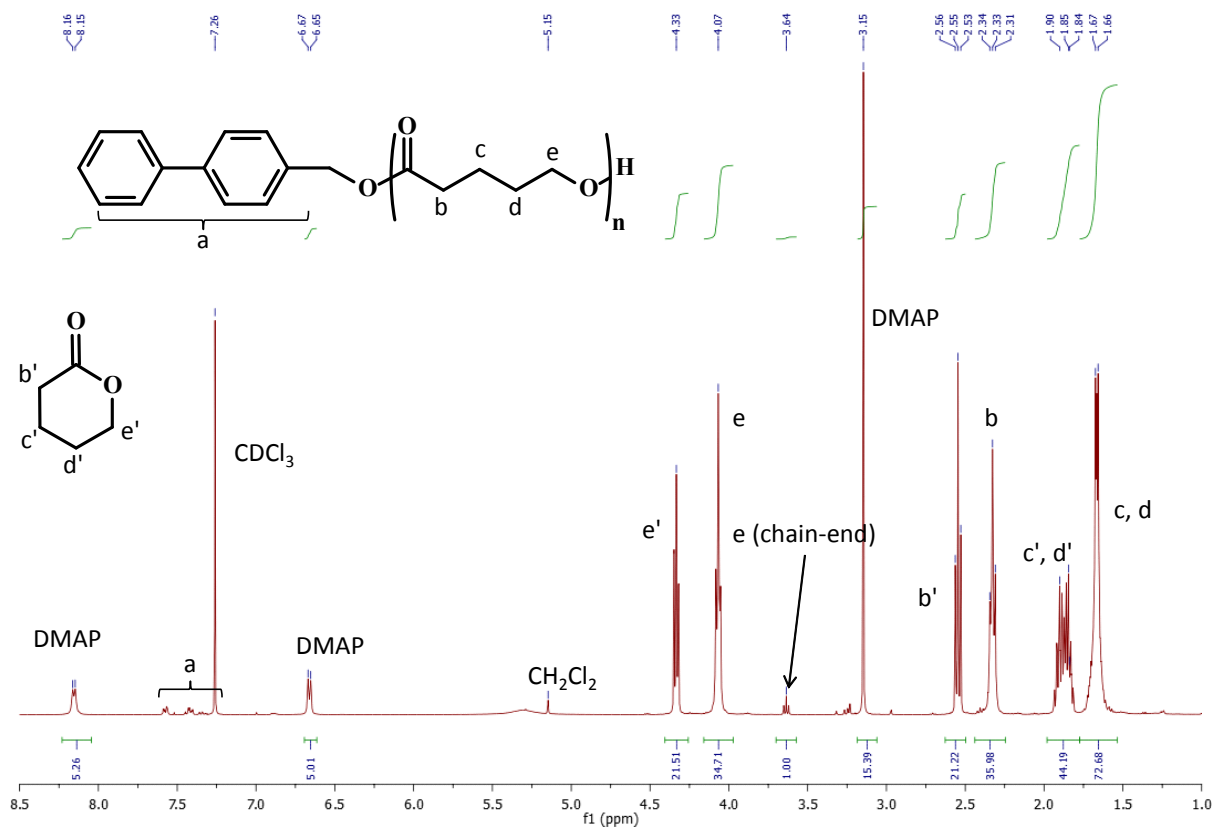

Figure S14. <sup>1</sup>H NMR spectrum of raw sample of run 40 (Table 4)

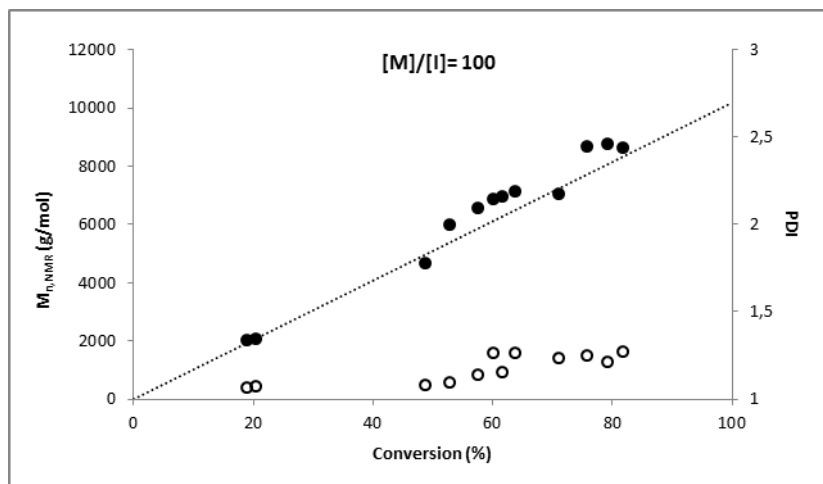

Figure S15. ROP of valerolactone ( $[M]/[I]=100$ ) catalyzed with DMAP/DMAP.HOTf catalytic system

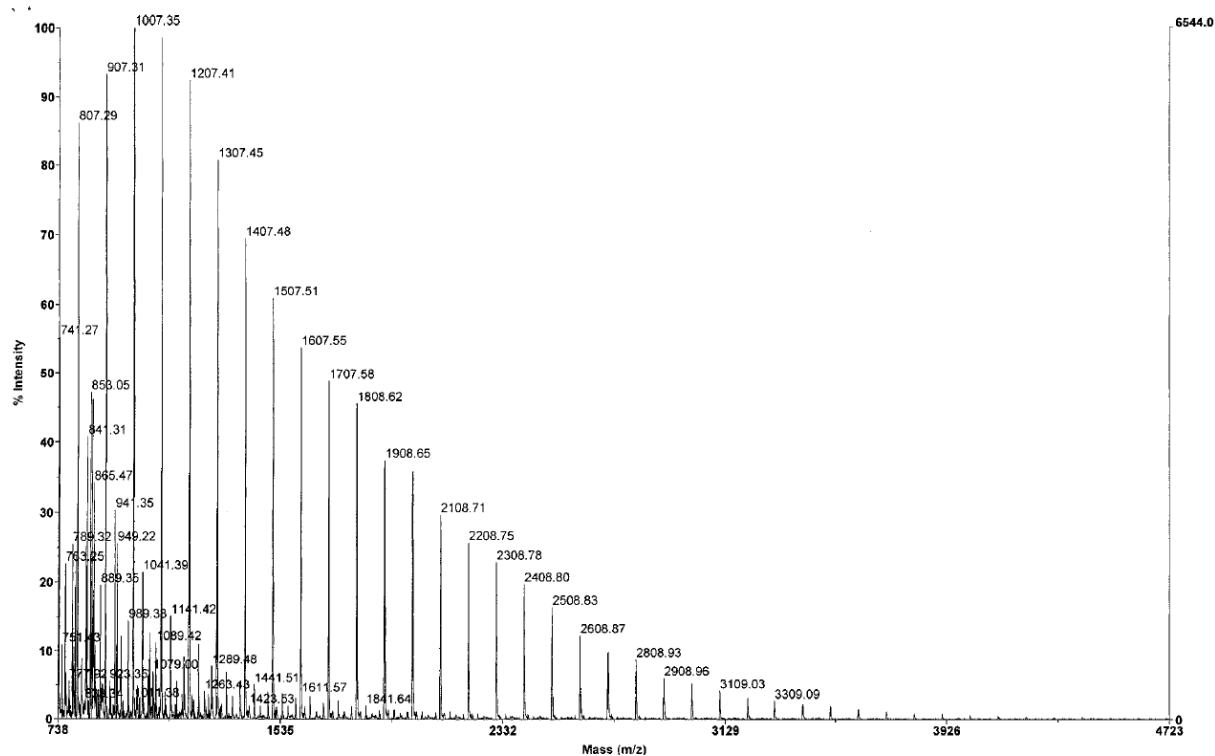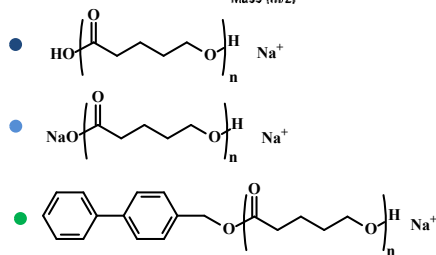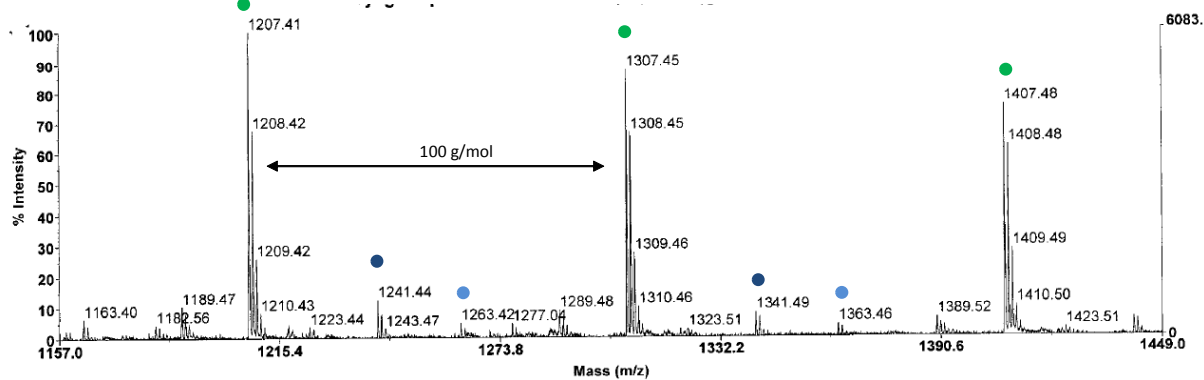

Figure S16. MALDI-TOF mass spectra of run 39 in Table 4 (top: full spectrum; bottom: zoom)

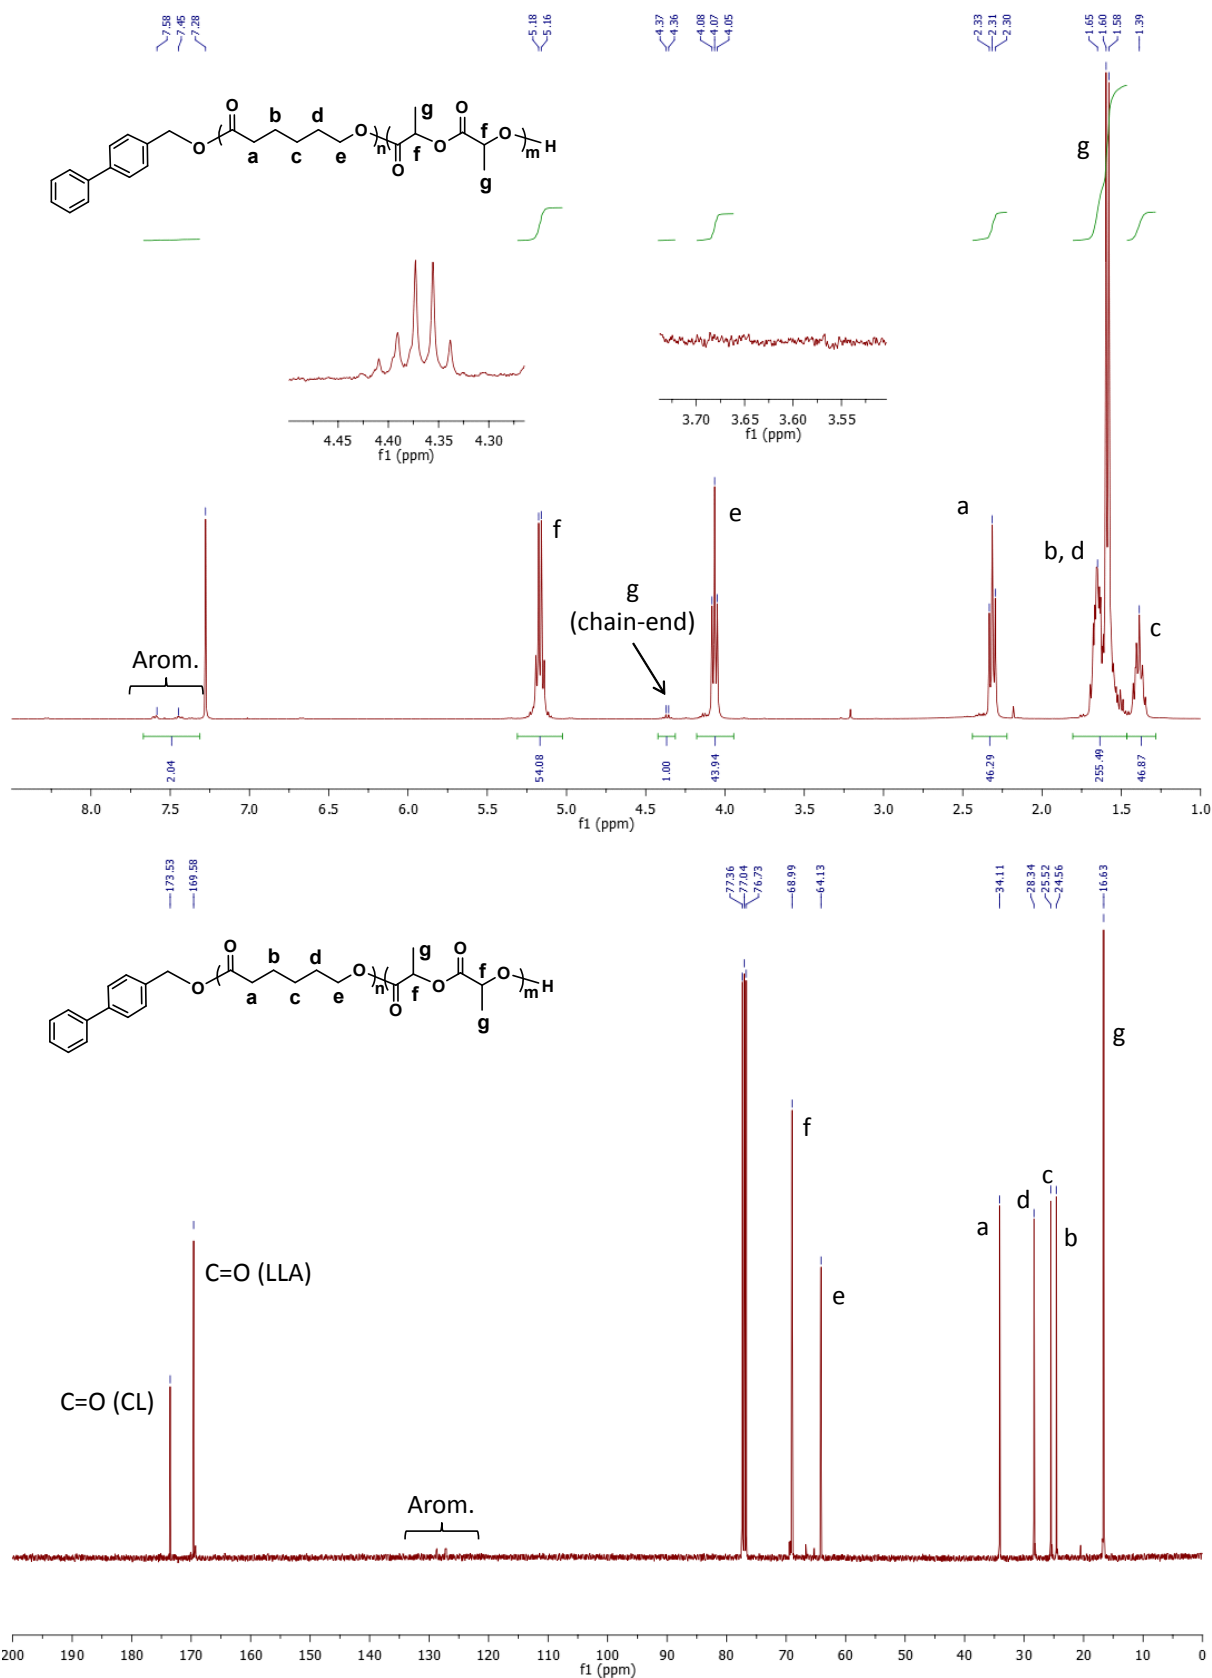

Figure S17.  $^1\text{H}$  and  $^{13}\text{C}$  NMR spectra of a PCL-*b*-PLLA.

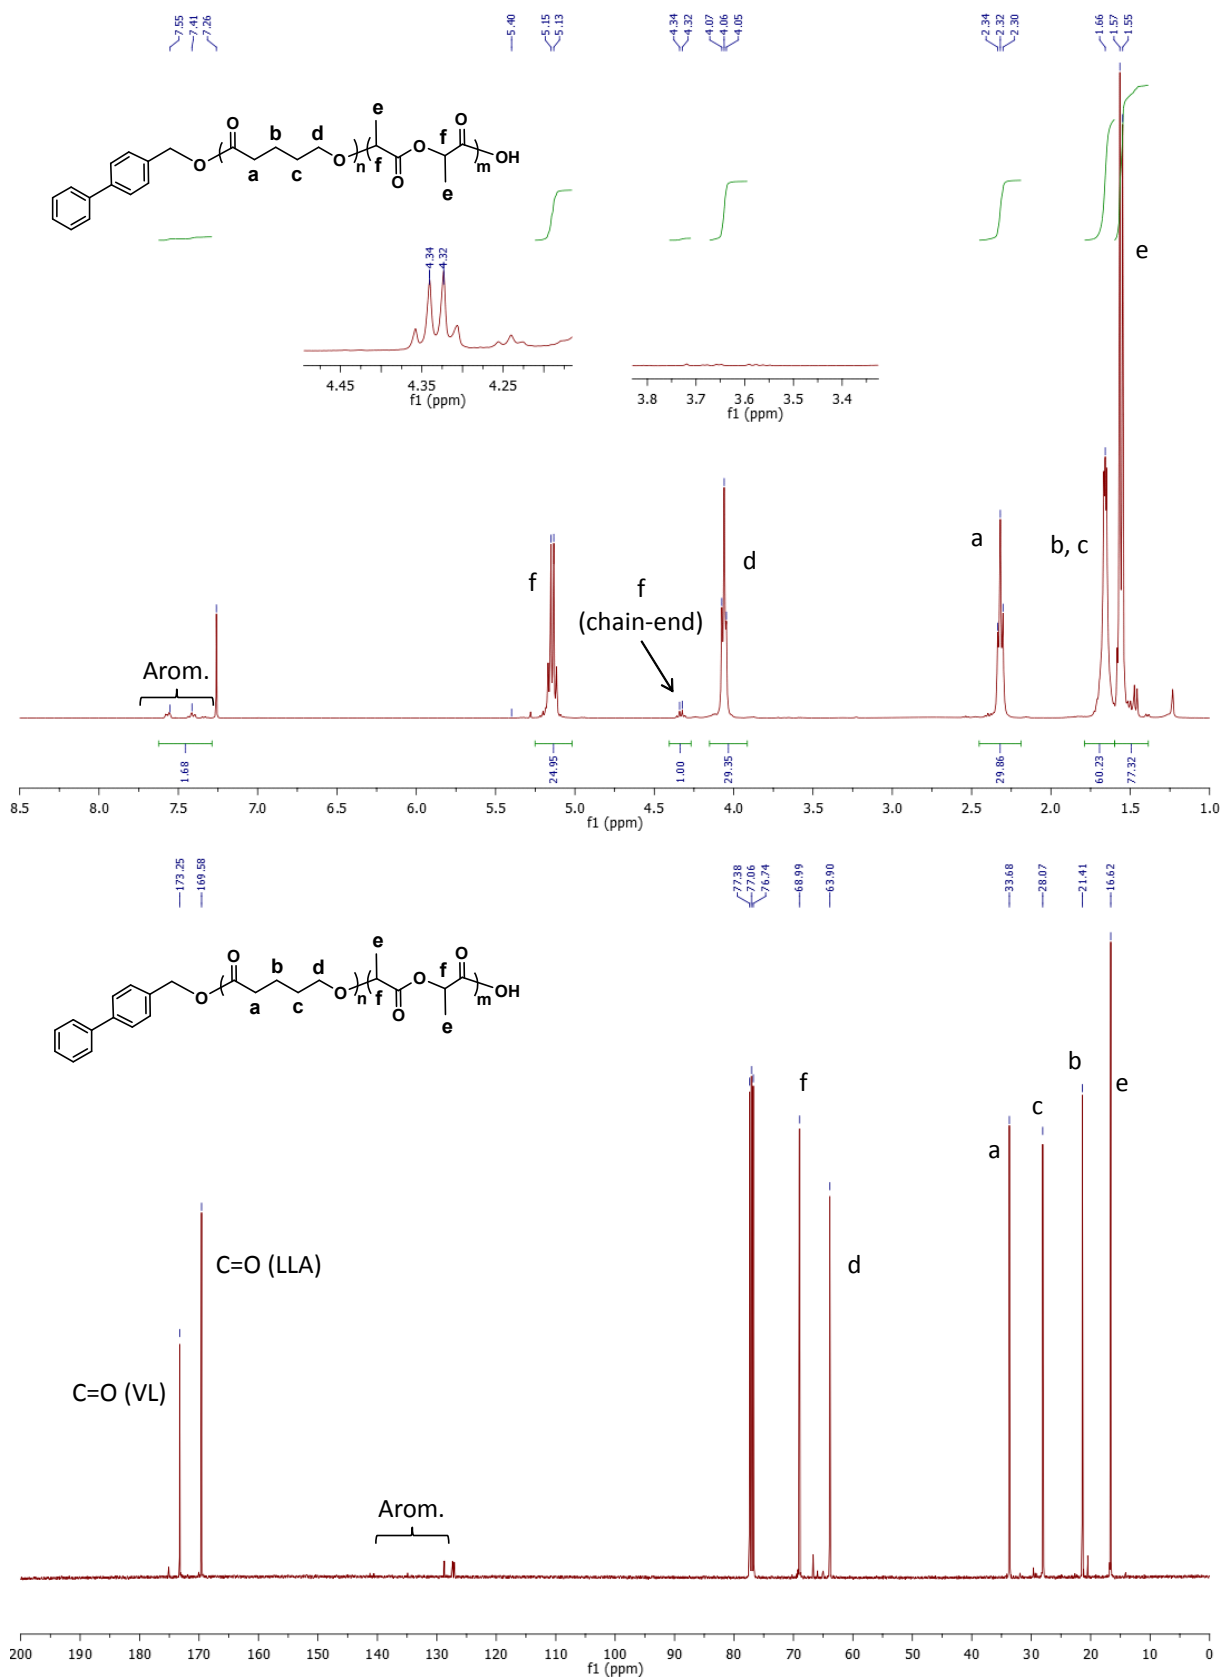

Figure S18.  $^1\text{H}$  and  $^{13}\text{C}$  NMR spectra of a PVL-*b*-PLLA.

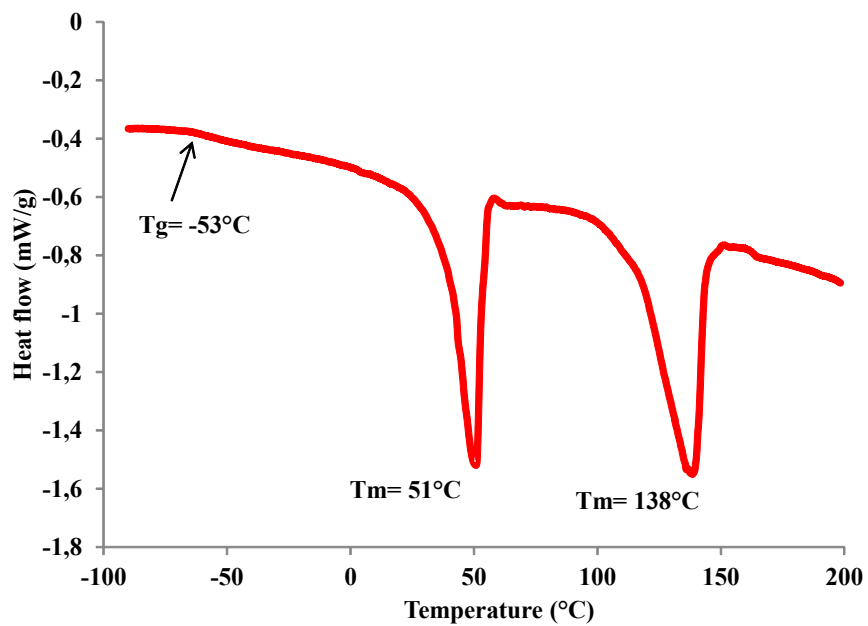

Figure S19. DSC thermogram of a PCL-*b*-PLLA.

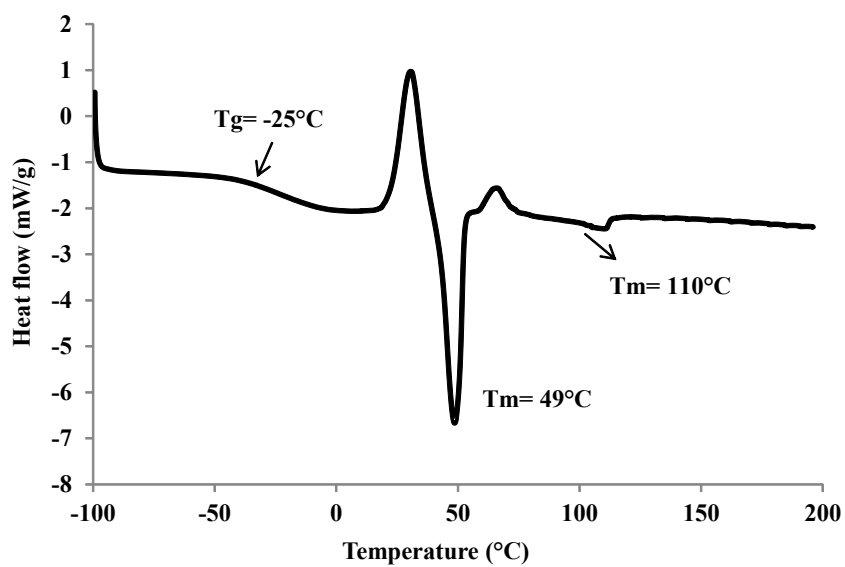

Figure S20. DSC thermogram of a PVL-*b*-PLLA.
